# Supplementary material for: Efficient Anomaly Heartbeat Detection Approach for Intermediate Nodes of Internet‐of‐Things Platforms
Source: Preprints.org preprint supplement (doi:10.20944/preprints202212.0014.v1), 2022-12-01
Supplement: Supplementary file 3 [file supplementary]

## Sheet: Code Example
	#!pip install xgboost
	from xgboost import XGBClassifier
	import xgboost as xgb
	xgbc = XGBClassifier()
	xgbc.fit(X_train_tf, y_train)
	y_train_preds = xgbc.predict_proba(X_train_tf)[:,1]
	y_valid_preds = xgbc.predict_proba(X_valid_tf)[:,1]
	print('Xtreme Gradient Boosting Classifier')
	print('Training:')
	xgbc_train_auc, xgbc_train_accuracy, xgbc_train_recall, xgbc_train_precision, \
	xgbc_train_specificity = print_report(y_train,y_train_preds, thresh)
	print('Validation:')
	xgbc_valid_auc, xgbc_valid_accuracy, xgbc_valid_recall, xgbc_valid_precision, \
	xgbc_valid_specificity = print_report(y_valid,y_valid_preds, thresh)
	lsttr=print_report(y_train,y_train_preds, thresh)
	lstva=print_report(y_valid,y_valid_preds, thresh)
	listn=["AUC", "Accuracy", "recall", "Precision", "Specification"]
	slr=pd.DataFrame(lsttr, columns = ['Training'])
	slr["Validate"]=lstva
	slr["Metric"]=listn
	#slr2=pd.DataFrame(listname, columns = ['Metric'])
	slr.to_excel(writer, sheet_name="Model-XGB", index=False)
	writer.save()

## Sheet: validation-dataset
age	sex	chest	resting_blood_pressure	serum_cholestoral	fasting_blood_sugar	resting_electrocardiographic_results	maximum_heart_rate_achieved	exercise_induced_angina	oldpeak	slope	number_of_major_vessels	thal	OUTPUT_LABEL
66	1	2	160	246	0	0	120	1	0	2	3	6	0
59	1	1	170	288	0	2	159	0	0.2	2	0	7	0
51	1	1	125	213	0	2	125	1	1.4	1	1	3	1
69	0	1	140	239	0	0	151	0	1.8	1	2	3	1
35	1	4	126	282	0	2	156	1	0	1	0	7	0
62	0	3	130	263	0	0	97	0	1.2	2	1	7	0
59	1	2	140	221	0	0	164	1	0	1	0	3	1
57	1	2	124	261	0	0	141	0	0.3	1	0	7	0
42	1	4	140	226	0	0	178	0	0	1	0	3	1
77	1	4	125	304	0	2	162	1	0	1	3	3	0
65	0	3	140	417	1	2	157	0	0.8	1	1	3	1
53	1	4	123	282	0	0	95	1	2	2	2	7	0
48	1	4	130	256	1	2	150	1	0	1	2	7	0
54	0	2	132	288	1	2	159	1	0	1	1	3	1
41	1	4	110	172	0	2	158	0	0	1	0	7	0
63	0	2	140	195	0	0	179	0	0	1	2	3	1
65	0	4	150	225	0	2	114	0	1	2	3	7	0
58	0	1	150	283	1	2	162	0	1	1	0	3	1
49	0	4	130	269	0	0	163	0	0	1	0	3	1
40	1	4	152	223	0	0	181	0	0	1	0	7	0
54	0	3	110	214	0	0	158	0	1.6	2	0	3	1
52	0	3	136	196	0	2	169	0	0.1	2	0	3	1
45	1	4	142	309	0	2	147	1	0	2	3	7	0
52	1	2	128	205	1	0	184	0	0	1	0	3	1
65	1	4	110	248	0	2	158	0	0.6	1	2	6	0
38	1	1	120	231	0	0	182	1	3.8	2	0	7	0
48	1	4	122	222	0	2	186	0	0	1	0	3	1
62	0	4	124	209	0	0	163	0	0	1	0	3	1
59	1	4	170	326	0	2	140	1	3.4	3	0	7	0
58	1	3	112	230	0	2	165	0	2.5	2	1	7	0
66	1	4	112	212	0	2	132	1	0.1	1	1	3	0
57	0	4	120	354	0	0	163	1	0.6	1	0	3	1
62	0	4	140	268	0	2	160	0	3.6	3	2	3	0
53	0	4	130	264	0	2	143	0	0.4	2	0	3	1
52	1	1	152	298	1	0	178	0	1.2	2	0	7	1
61	0	4	130	330	0	2	169	0	0	1	0	3	0
60	1	4	117	230	1	0	160	1	1.4	1	2	7	0
61	0	4	145	307	0	2	146	1	1	2	0	7	0
39	1	3	140	321	0	2	182	0	0	1	0	3	1
56	0	2	140	294	0	2	153	0	1.3	2	0	3	1
41	0	2	105	198	0	0	168	0	0	1	1	3	1
60	1	3	140	185	0	2	155	0	3	2	0	3	0
54	1	4	110	206	0	2	108	1	0	2	1	3	0
42	0	3	120	209	0	0	173	0	0	2	0	3	1
55	1	4	140	217	0	0	111	1	5.6	3	0	7	0
58	1	3	140	211	1	2	165	0	0	1	0	3	1
64	0	3	140	313	0	0	133	0	0.2	1	0	7	1
54	1	3	125	273	0	2	152	0	0.5	3	1	3	1
42	1	3	130	180	0	0	150	0	0	1	0	3	1
54	0	3	108	267	0	2	167	0	0	1	0	3	1
57	1	3	128	229	0	2	150	0	0.4	2	1	7	0
53	1	4	142	226	0	2	111	1	0	1	0	7	1
51	0	4	130	305	0	0	142	1	1.2	2	0	7	0
58	1	3	105	240	0	2	154	1	0.6	2	0	7	1
56	1	4	132	184	0	2	105	1	2.1	2	1	6	0
43	1	4	150	247	0	0	171	0	1.5	1	0	3	1
62	1	2	128	208	1	2	140	0	0	1	0	3	1
63	1	4	130	330	1	2	132	1	1.8	1	3	7	0
37	0	3	120	215	0	0	170	0	0	1	0	3	1
41	1	2	135	203	0	0	132	0	0	2	0	6	1
58	1	3	132	224	0	2	173	0	3.2	1	2	7	0
50	1	3	129	196	0	0	163	0	0	1	0	3	1
54	1	4	140	239	0	0	160	0	1.2	1	0	3	1
66	1	4	160	228	0	2	138	0	2.3	1	0	6	1
59	1	1	160	273	0	2	125	0	0	1	0	3	0
61	1	4	140	207	0	2	138	1	1.9	1	1	7	0
59	1	4	138	271	0	2	182	0	0	1	0	3	1
58	1	2	120	284	0	2	160	0	1.8	2	0	3	0
35	1	4	120	198	0	0	130	1	1.6	2	0	7	0
50	0	2	120	244	0	0	162	0	1.1	1	0	3	1
45	0	2	112	160	0	0	138	0	0	2	0	3	1
67	1	4	125	254	1	0	163	0	0.2	2	2	7	0
56	1	2	120	236	0	0	178	0	0.8	1	0	3	1
44	1	4	110	197	0	2	177	0	0	1	1	3	0
41	0	2	130	204	0	2	172	0	1.4	1	0	3	1
67	0	4	106	223	0	0	142	0	0.3	1	2	3	1
59	1	3	126	218	1	0	134	0	2.2	2	1	6	0
46	1	2	101	197	1	0	156	0	0	1	0	7	1
60	1	4	125	258	0	2	141	1	2.8	2	1	7	0
59	1	4	135	234	0	0	161	0	0.5	2	0	7	1
60	1	4	145	282	0	2	142	1	2.8	2	2	7	0
62	0	4	150	244	0	0	154	1	1.4	2	0	3	0
58	1	4	128	216	0	2	131	1	2.2	2	3	7	0
70	1	4	145	174	0	0	125	1	2.6	3	0	7	0
62	0	4	138	294	1	0	106	0	1.9	2	3	3	0
42	1	1	148	244	0	2	178	0	0.8	1	2	3	1
43	1	4	120	177	0	2	120	1	2.5	2	0	7	0
66	1	4	120	302	0	2	151	0	0.4	2	0	3	1
44	1	2	120	263	0	0	173	0	0	1	0	7	1
47	1	3	108	243	0	0	152	0	0	1	0	3	0
44	1	3	130	233	0	0	179	1	0.4	1	0	3	1
65	1	1	138	282	1	2	174	0	1.4	2	1	3	0
59	1	4	110	239	0	2	142	1	1.2	2	1	7	0
41	1	3	130	214	0	2	168	0	2	2	0	3	1
43	1	3	130	315	0	0	162	0	1.9	1	1	3	1
50	0	3	120	219	0	0	158	0	1.6	2	0	3	1
47	1	3	138	257	0	2	156	0	0	1	0	3	1
52	1	4	112	230	0	0	160	0	0	1	1	3	0
56	1	1	120	193	0	2	162	0	1.9	2	0	7	1
53	0	4	138	234	0	2	160	0	0	1	0	3	1
40	1	1	140	199	0	0	178	1	1.4	1	0	7	1
71	0	2	160	302	0	0	162	0	0.4	1	2	3	1
34	0	2	118	210	0	0	192	0	0.7	1	0	3	1
58	1	4	100	234	0	0	156	0	0.1	1	1	7	0
57	1	4	110	201	0	0	126	1	1.5	2	0	6	1
43	0	3	122	213	0	0	165	0	0.2	2	0	3	1
52	1	2	120	325	0	0	172	0	0.2	1	0	3	1
55	0	4	180	327	0	1	117	1	3.4	2	0	3	0
42	0	4	102	265	0	2	122	0	0.6	2	0	3	1
46	1	4	120	249	0	2	144	0	0.8	1	0	7	0
45	1	4	115	260	0	2	185	0	0	1	0	3	1
67	1	4	120	229	0	2	129	1	2.6	2	2	7	0
46	1	3	150	231	0	0	147	0	3.6	2	0	3	0
67	0	3	152	277	0	0	172	0	0	1	1	3	1
54	1	4	120	188	0	0	113	0	1.4	2	1	7	0
54	1	4	124	266	0	2	109	1	2.2	2	1	7	0
55	1	2	130	262	0	0	155	0	0	1	0	3	1
64	0	4	180	325	0	0	154	1	0	1	0	3	1
48	1	2	130	245	0	2	180	0	0.2	2	0	3	1
52	1	4	128	255	0	0	161	1	0	1	1	7	0
43	0	4	132	341	1	2	136	1	3	2	0	7	0
52	1	4	108	233	1	0	147	0	0.1	1	3	7	1
57	1	3	150	126	1	0	173	0	0.2	1	1	7	1
51	1	3	94	227	0	0	154	1	0	1	1	7	1
71	0	4	112	149	0	0	125	0	1.6	2	0	3	1
47	1	4	110	275	0	2	118	1	1	2	1	3	0
48	0	3	130	275	0	0	139	0	0.2	1	0	3	1
35	0	4	138	183	0	0	182	0	1.4	1	0	3	1
68	1	3	180	274	1	2	150	1	1.6	2	0	7	0
42	1	2	120	295	0	0	162	0	0	1	0	3	1
64	1	4	120	246	0	2	96	1	2.2	3	1	3	0
60	0	3	120	178	1	0	96	0	0	1	0	3	1
49	1	3	120	188	0	0	139	0	2	2	3	7	0
48	1	4	124	274	0	2	166	0	0.5	2	0	7	0
51	0	3	120	295	0	2	157	0	0.6	1	0	3	1
58	0	4	100	248	0	2	122	0	1	2	0	3	1
63	1	1	145	233	1	2	150	0	2.3	3	0	6	1
71	0	3	110	265	1	2	130	0	0	1	1	3	1
51	1	3	125	245	1	2	166	0	2.4	2	0	3	1
47	1	4	112	204	0	0	143	0	0.1	1	0	3	1
63	1	4	130	254	0	2	147	0	1.4	2	1	7	0
41	1	3	112	250	0	0	179	0	0	1	0	3	1
63	0	4	150	407	0	2	154	0	4	2	3	7	0
44	0	3	118	242	0	0	149	0	0.3	2	1	3	1
61	1	3	150	243	1	0	137	1	1	2	0	3	1
45	1	4	104	208	0	2	148	1	3	2	0	3	1
57	0	4	128	303	0	2	159	0	0	1	1	3	1
39	0	3	94	199	0	0	179	0	0	1	0	3	1
65	0	3	155	269	0	0	148	0	0.8	1	0	3	1
52	1	1	118	186	0	2	190	0	0	2	0	6	1
65	1	4	135	254	0	2	127	0	2.8	2	1	7	0
58	1	4	146	218	0	0	105	0	2	2	1	7	0
60	0	4	150	258	0	2	157	0	2.6	2	2	7	0
44	1	2	120	220	0	0	170	0	0	1	0	3	1
41	1	2	110	235	0	0	153	0	0	1	0	3	1
50	0	4	110	254	0	2	159	0	0	1	0	3	1
51	0	3	140	308	0	2	142	0	1.5	1	1	3	1
49	0	2	134	271	0	0	162	0	0	2	0	3	1
57	1	4	132	207	0	0	168	1	0	1	0	7	1
44	1	3	140	235	0	2	180	0	0	1	0	3	1
59	0	4	174	249	0	0	143	1	0	2	0	3	0
53	1	3	130	246	1	2	173	0	0	1	3	3	1
54	1	3	150	232	0	2	165	0	1.6	1	0	7	1
57	1	4	152	274	0	0	88	1	1.2	2	1	7	0
56	1	4	130	283	1	2	103	1	1.6	3	0	7	0
67	1	4	120	237	0	0	71	0	1	2	0	3	0
40	1	4	110	167	0	2	114	1	2	2	0	7	0
51	1	4	140	261	0	2	186	1	0	1	0	3	1
49	1	2	130	266	0	0	171	0	0.6	1	0	3	1
42	1	3	120	240	1	0	194	0	0.8	3	0	7	1
64	0	4	130	303	0	0	122	0	2	2	2	3	1
64	1	4	128	263	0	0	105	1	0.2	2	1	7	1
55	1	4	132	353	0	0	132	1	1.2	2	1	7	0
58	1	4	150	270	0	2	111	1	0.8	1	0	7	0
51	1	4	140	298	0	0	122	1	4.2	2	3	7	0
64	1	3	140	335	0	0	158	0	0	1	0	3	0
58	1	4	128	259	0	2	130	1	3	2	2	7	0
61	1	4	120	260	0	0	140	1	3.6	2	1	7	0
56	0	4	134	409	0	2	150	1	1.9	2	2	7	0
56	0	4	200	288	1	2	133	1	4	3	2	7	0
51	1	4	140	299	0	0	173	1	1.6	1	0	7	0
54	1	4	110	239	0	0	126	1	2.8	2	1	7	0
50	1	3	140	233	0	0	163	0	0.6	2	1	7	0
37	1	3	130	250	0	0	187	0	3.5	3	0	3	1
46	1	4	140	311	0	0	120	1	1.8	2	2	7	0
56	1	3	130	256	1	2	142	1	0.6	2	1	6	0
69	1	3	140	254	0	2	146	0	2	2	3	7	0
60	0	1	150	240	0	0	171	0	0.9	1	0	3	1
65	1	4	120	177	0	0	140	0	0.4	1	0	7	1

## Sheet: Model-SLR
Training	Validate	Metric
0.918893	0.930769	AUC
0.835294	0.853659	Accuracy
0.847059	0.884615	recall
0.827586	0.884615	Precision
0.823529	0.8	Specification

## Sheet: Model-KNN
Training	Validate	Metric
0.905536	0.924359	AUC
0.823529	0.804878	Accuracy
0.894118	0.846154	recall
0.783505	0.846154	Precision
0.741176	0.666667	Specification

## Sheet: Model-LR
Training	Validate	Metric
0.923183	0.920513	AUC
0.852941	0.853659	Accuracy
0.870588	0.846154	recall
0.840909	0.916667	Precision
0.835294	0.866667	Specification

## Sheet: Model-SGDC
Training	Validate	Metric
0.919585	0.928205	AUC
0.841176	0.878049	Accuracy
0.858824	0.884615	recall
0.829545	0.92	Precision
0.823529	0.866667	Specification

## Sheet: Model-NB
Training	Validate	Metric
0.905329	0.923077	AUC
0.841176	0.878049	Accuracy
0.858824	0.884615	recall
0.829545	0.92	Precision
0.823529	0.866667	Specification

## Sheet: Model-DT
Training	Validate	Metric
1	0.732051	AUC
1	0.731707	Accuracy
1	0.730769	recall
1	0.826087	Precision
1	0.733333	Specification

## Sheet: Model-RF
Training	Validate	Metric
0.999446	0.930769	AUC
0.994118	0.878049	Accuracy
1	0.884615	recall
0.988372	0.92	Precision
0.988235	0.866667	Specification

## Sheet: Model-GBC
Training	Validate	Metric
1	0.876923	AUC
1	0.804878	Accuracy
1	0.807692	recall
1	0.875	Precision
1	0.8	Specification

[truncated: 4 more sheets: Model-ETC, Model-XGB, Model-SNN, Model-MLPC]
